# Supplementary material for: MEA Preparation for Direct Formate/Formic Acid Fuel Cell—Comparison of Palladium Black and Palladium Supported on Activated Carbon Performance on Power Generation in Passive Fuel Cell
Source: Membranes (Basel). 2020 Nov 19;10(11):355. doi: 10.3390/membranes10110355 (PMC7699197; doi:10.3390/membranes10110355)
Supplement: Supplementary file 1 [file membranes-10-00355-s001.pdf]

# MEA preparation for direct formate/formic acid fuel cell – comparison of palladium black and palladium supported on activated carbon performance on power generation in passive fuel cell

Adrianna Nogalska <sup>1\*</sup>, Andreu Bonet Navarro <sup>1, 2</sup> and Ricard Garcia-Valls <sup>1,2</sup>

<sup>1</sup> Eurecat, Centre Tecnològic de Catalunya, C/Marcel·lí Domingo, Tarragona, 43007, Spain; adrianna.nogalska@eurecat.org (A.N.), andreu.bonet@eurecat.org (A.B.), [ricard.garcia@eurecat.org](mailto:ricard.garcia@eurecat.org) (R.G.)

<sup>2</sup> Department of Chemical Engineering, Universitat Rovira I Virgili, Av. Països Catalans, 26, 43007, Tarragona Spain; [andreu.bonet@estudiants.urv.cat](mailto:andreu.bonet@estudiants.urv.cat) (A.B.), ricard.garcia@urv.cat (R.G.),

\* Correspondence: adrianna.nogalska@eurecat.org; Tel.: +34-977-297-089

Received: date; Accepted: date; Published: date

**Table S1.** List of abbreviations

| <b>Abbreviation</b> | <b>Full name</b>              |
|---------------------|-------------------------------|
| MEA                 | membrane electrode assembly   |
| PEM                 | proton exchange membrane      |
| CCM                 | catalyst coated membrane      |
| GDE                 | gas diffusion electrode       |
| GDL                 | gas diffusion layer           |
| PdB                 | palladium black               |
| PdC                 | palladium on activated carbon |
| MP                  | maximum power                 |
| FC                  | fuel cell                     |
| PMMA                | polymethyl methacrylate       |
| OCP                 | open circuit potential        |
| HCOOH               | Formic acid                   |
| HCOOK               | Potassium formate,            |
| DFAFC               | Direct Formic Acid Fuel Cell  |
| XRD                 | X-ray diffraction             |

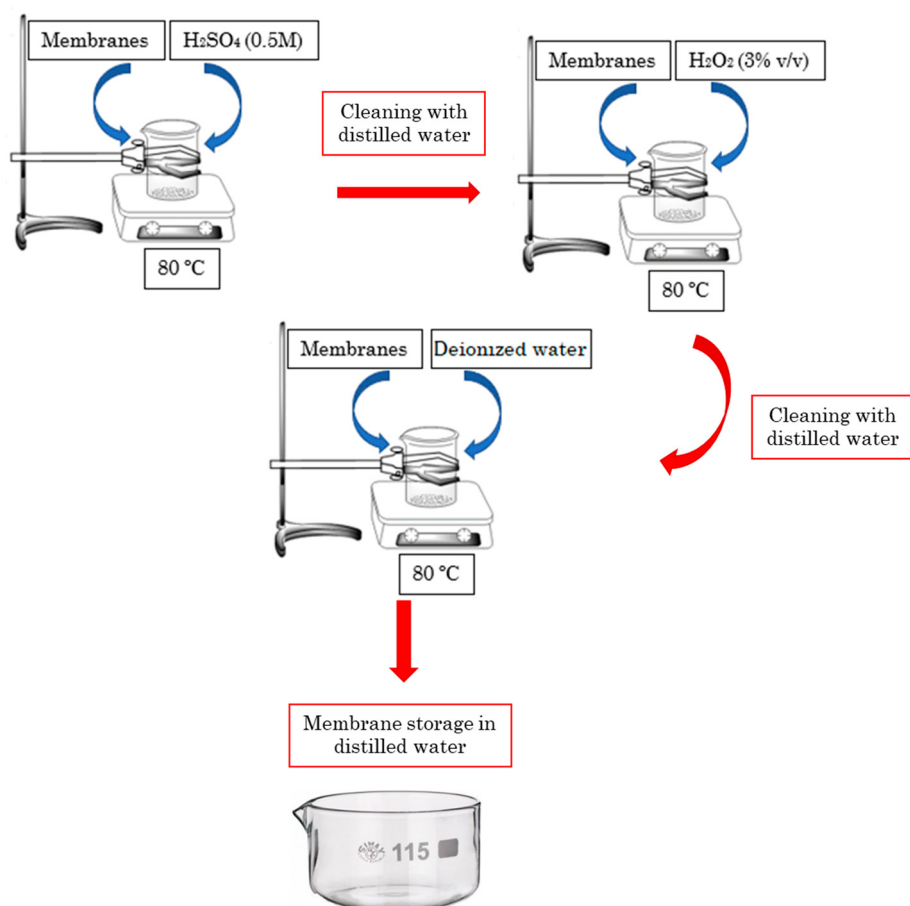

**Figure S1.** Nafion membrane cleaning procedure:

- 1.-Cut the membranes (using scissors) into pieces with desired size, but small enough to fit into the bottom of a 1l beaker.
- 2.-Immerge the membranes into 1l beaker with  $\text{H}_2\text{SO}_4$  preheated up to 80 degrees with bath oil and leave them during 1h with stirring.
- 3.-Clean the membranes with distilled water immerging and shaking them into a big crystallizer before continuing with next step.
- 4.- Immerge the membranes into 1l beaker with  $\text{H}_2\text{O}_2$  preheated up to 80 degrees with bath oil and leave them during 1h with stirring.
- 5.-Clean the membranes with distilled water immerging and shaking them into a big crystallizer before continuing with next step.
- 6.- Immerge the membranes into 1l beaker with distilled water preheated up to 80 degrees with bath oil and leave them during 1h with stirring.
- 7.-Store the membranes into a big crystallizer with distilled water (the membranes must be wet) and cover it with watch glass.

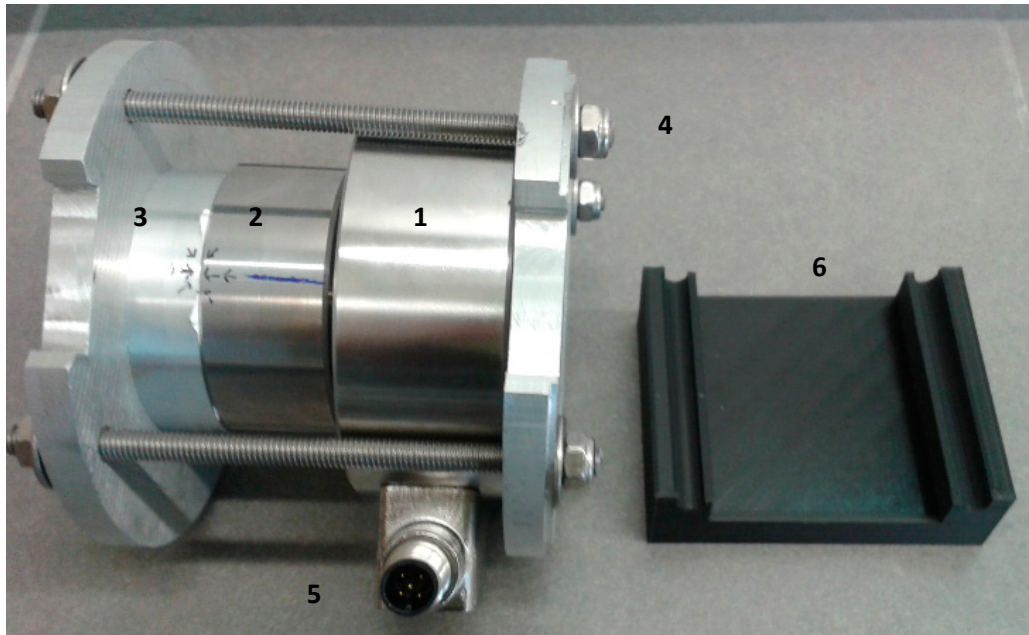

**Figure S2.** Home-made system for MEA fabrication. Devise an adjustment system is based on two plates of high hardness material, held by threaded rods in through holes at four opposite points (4). Inside the two plates is the load cell (1) with the flat-surface lug (2), and an additional part (3) of the same dimensions as the lug. The MEA placed between the additional piece and the stud is compressed by adjusting the screws always diagonally and measuring the value of the force exerted though the compression SENSING, S.L device connected in port (5). Once the required value is reached, the cell display can be disconnected.

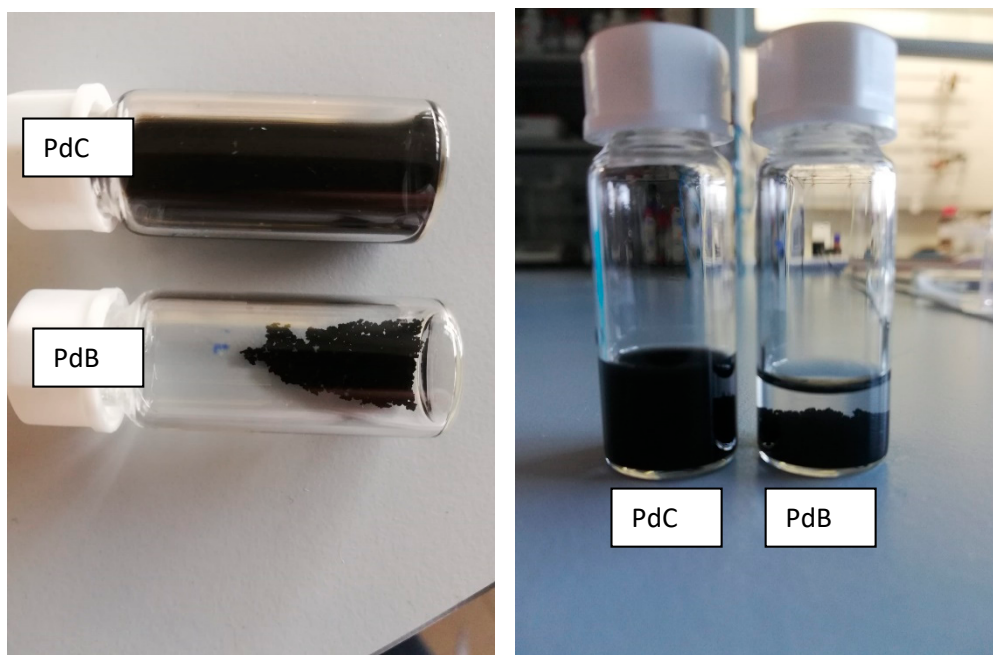

**Figure S3.** Catalytic ink. Comparison of homogeneous dispersion of catalyst in ink between PdC and PdB. The suspensions were sonicated in exaggerated time (2 h) to be able to appreciate the aggregation of particles of unsupported catalyst with naked eye.
